# Supplementary material for: Morphological and behavioural changes occur following the X-ray irradiation of the adult mouse olfactory neuroepithelium
Source: PubMed Central journal article supplement (PMC3536589; doi:10.1186/1471-2202-13-134), 2012-10-31
Supplement: 1471-2202-13-134-S1.pdf [file 1471-2202-13-134-S1.pdf]

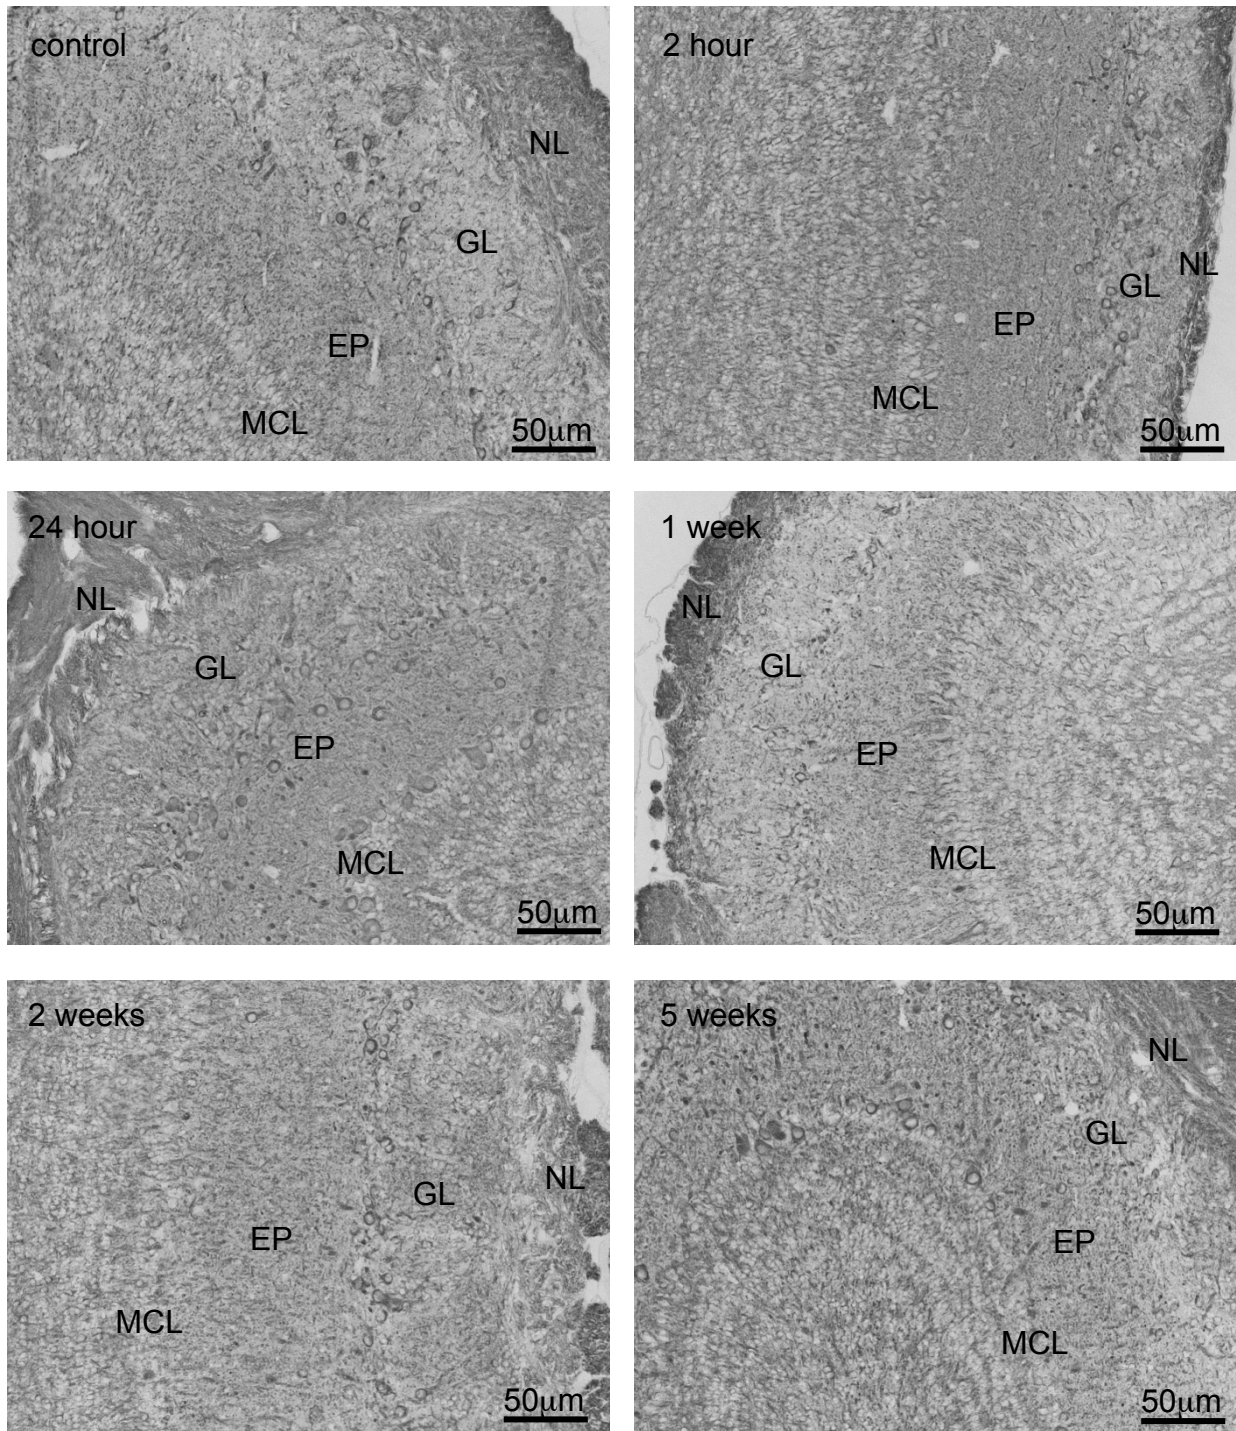

**Additional Figure 1:** Photomicrographs of mouse olfactory bulbs in control and irradiated mice labelled with  $\beta$ III Tubulin. In all mice examined (n=3 mice per group) there was no change in expression levels of  $\beta$ III Tubulin. There was also no morphological alterations post-irradiation. (NL=nerve fibre layer, GL=glomerular layer, EP=external plexiform layer, MCL=mitral cell layer)
